# Supplementary material
Source: HighWire-hosted journal article supplement (https://rapm.bmj.com/highwire/filestream/14954/field_highwire_adjunct_files/1/rapm-2021-102561supp002_data_supplement.pdf)
Supplement: rapm-2021-102561supp002_data_supplement.pdf [file rapm-2021-102561supp002_data_supplement.pdf]

# Acute Care and Perioperative Point of Care Ultrasound

*Helping Bring Providers Out of the Guessing Game*

## F.O.R.E.S.I.G.H.T. Comprehensive Perioperative Ultrasound Examination

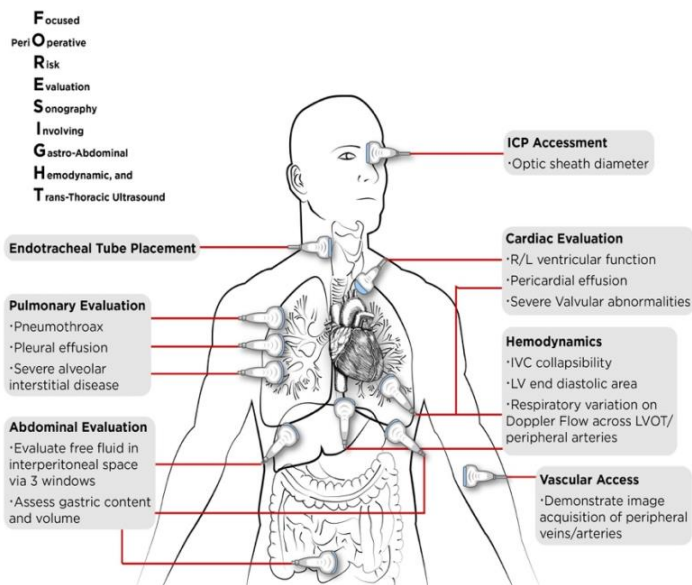

- I.**      **Ultrasound Physics**
- II.**     **Assessment of Volume Status/Mechanism of Hypotension**
- A.** IVC Diameter and Collapsibility
  - B.** Left Ventricle End-Diastolic Area
  - C.** Respiratory Variation of Velocity Time Integral
  - D.** FAST (Focused Assessment with Sonography for Trauma) Exam
- III.**    **Pulmonary Ultrasound**
- A.** Pneumothorax Evaluation
  - B.** Pleural Fluid Evaluation
  - C.** Lung Parenchyma Evaluation
- IV.**    **Cardiac Ultrasound**
- A.** Parasternal Views and Assessment of Left Ventricular Contractility
  - B.** Apical Views
  - C.** Subxiphoid Views.
  - D.** Tips for Cardiac Ultrasound Imaging
  - E.** Cardiac Valve Evaluation
  - F.** Cardiac Ultrasound for Patients with Diastolic and Systolic Heart Failure
  - G.** Right Ventricular Systolic Function Assessment
- V.**      **Additional Topics**
- A.** Vascular Access
  - B.** Deep Venous Thrombosis Evaluation
  - C.** Pulmonary Embolus Evaluation
  - D.** Gastric Volume Assessment
  - E.** Intracranial Pressure Assessment
  - F.** Airway Ultrasound and Localization of Endotracheal Tube.
- VI.**    **FORESIGHT Exam Review Sheets, Questions and Answers**
